# Supplementary material
Source: PubMed Central journal article supplement (PMC5794628)
Supplement: NIHMS918143-supplement-1.pdf [file NIHMS918143-supplement-1.pdf]

**Supplementary Table 1. *P. acnes* strains used in the study.**

|                                             | <b>Strain</b>                    | <b>Ribotype</b> | <b>Phylotype</b>                | <b>MLST<sub>4</sub></b>     |
|---------------------------------------------|----------------------------------|-----------------|---------------------------------|-----------------------------|
|                                             |                                  | 16S<br>sequence | SNPs in core<br>genome          | Multi locus sequence typing |
| <b>P<sub>A</sub><br/>(Acne)</b>             | HL110PA1<br>HL043PA1<br>HL096PA1 | 4, 5, 8         | IA-2, IB-1<br>(p <sup>+</sup> ) | IA                          |
| <b>P<sub>H</sub><br/>(Healthy<br/>skin)</b> | HL042PA3<br>HL110PA3<br>HL110PA4 | 6               | II                              | II                          |

**Supplementary Table 2. Cloning efficiency and functional retention of T cell clones.**

| <b>Donor</b> | <b><i>P. acnes</i> stimulus</b>               | <b>T cell subset</b> | <b>Cytokine profile</b> | <b>Wells seeded</b> | <b>Established clones</b> | <b>Functional clones</b> |
|--------------|-----------------------------------------------|----------------------|-------------------------|---------------------|---------------------------|--------------------------|
| <b>D1</b>    | P <sub>A</sub> - associated strain (HL096PA1) | CD4 <sup>+</sup>     | IL-17 <sup>+</sup>      | 576                 | 172 (30%)                 | 34                       |
|              | P <sub>H</sub> - associated strain (HL110PA3) | CD4 <sup>+</sup>     | IL-17 <sup>+</sup>      | 323                 | 110 (34%)                 | 39                       |
| <b>D2</b>    | P <sub>A</sub> - associated strain (HL096PA1) | CD4 <sup>+</sup>     | IL-17 <sup>+</sup>      | 250                 | 65 (26%)                  | 16                       |
|              | P <sub>H</sub> - associated strain (HL110PA3) | CD4 <sup>+</sup>     | IL-17 <sup>+</sup>      | 315                 | 84 (27%)                  | 18                       |
| <b>D3</b>    | P <sub>A</sub> - associated strain (HL096PA1) | CD4 <sup>+</sup>     | IL-17 <sup>+</sup>      | 216                 | 64 (30%)                  | 26                       |
|              | P <sub>H</sub> - associated strain (HL110PA3) | CD4 <sup>+</sup>     | IL-17 <sup>+</sup>      | 180                 | 48 (27%)                  | 21                       |
| <b>D4</b>    | P <sub>A</sub> - associated strain (HL096PA1) | CD4 <sup>+</sup>     | IL-17 <sup>+</sup>      | 220                 | 68 (31%)                  | 12                       |
|              | P <sub>H</sub> - associated strain (HL110PA3) | CD4 <sup>+</sup>     | IL-17 <sup>+</sup>      | 224                 | 70 (31%)                  | 17                       |

**Supplementary Table 3. Primers used in the study**

| Gene symbol | Forward primer sequence   | Reverse primer sequence | GenBank Accession number |
|-------------|---------------------------|-------------------------|--------------------------|
| GAPDH       | TGCACCACCAACTGCTTAGC      | GGCATGGACTGTGGTCATGAG   | NM_001256799             |
| IL17A       | ACCAATCCCAAAGGTCCTC       | GGGGACAGAGTTCATGTGGT    | NM_002190                |
| IL17RA      | CAGCGGTCTGGTTATCGTCT      | AAATGCCCGCCACATAGTAG    | NM_014339                |
| RORA        | GCCTTTGACTCTCAGAACAACACCG | TCTTTCAAATTCAAACACAAAGC | NM_134261                |
| RORC        | TTTTCCGAGGATGAGATTGC      | CTTTCCACATGCTGGCTACA    | NM_005060                |
| IL17RC      | GCCCCATGGACAAATACATC      | CCTGTTTCAAGAGCCTCAGC    | NM_153461                |
| IL-22       | CTTGGTACAGGGAGGAGCAG      | CCTCCTTAGCCAGCATGAAG    | NM_020525                |
| IL-26       | TGAGGTGTGGGTTGCTGTTA      | AGAGAGCGTCAACAGCTTGG    | NM_018402                |
| tbet        | CAGCACCTTCTAGGACACC       | ACCACGTCCACAAACATCCT    | XM_011524698             |
| IL-23R      | CATGACTTGCACCTGGAATG      | GCTTGGACCCAAACCAAGTA    | NM_144701                |
| DEFB4       | TTTGGTGGTATAGGCGATCC      | GAGACCACAGGTGCCAATTT    | NM_004942                |
| LL-37       | ACAAGAGATTTGCCCTGCTG      | GGGTACAAGATTCCGCAAAA    | NM_004345                |

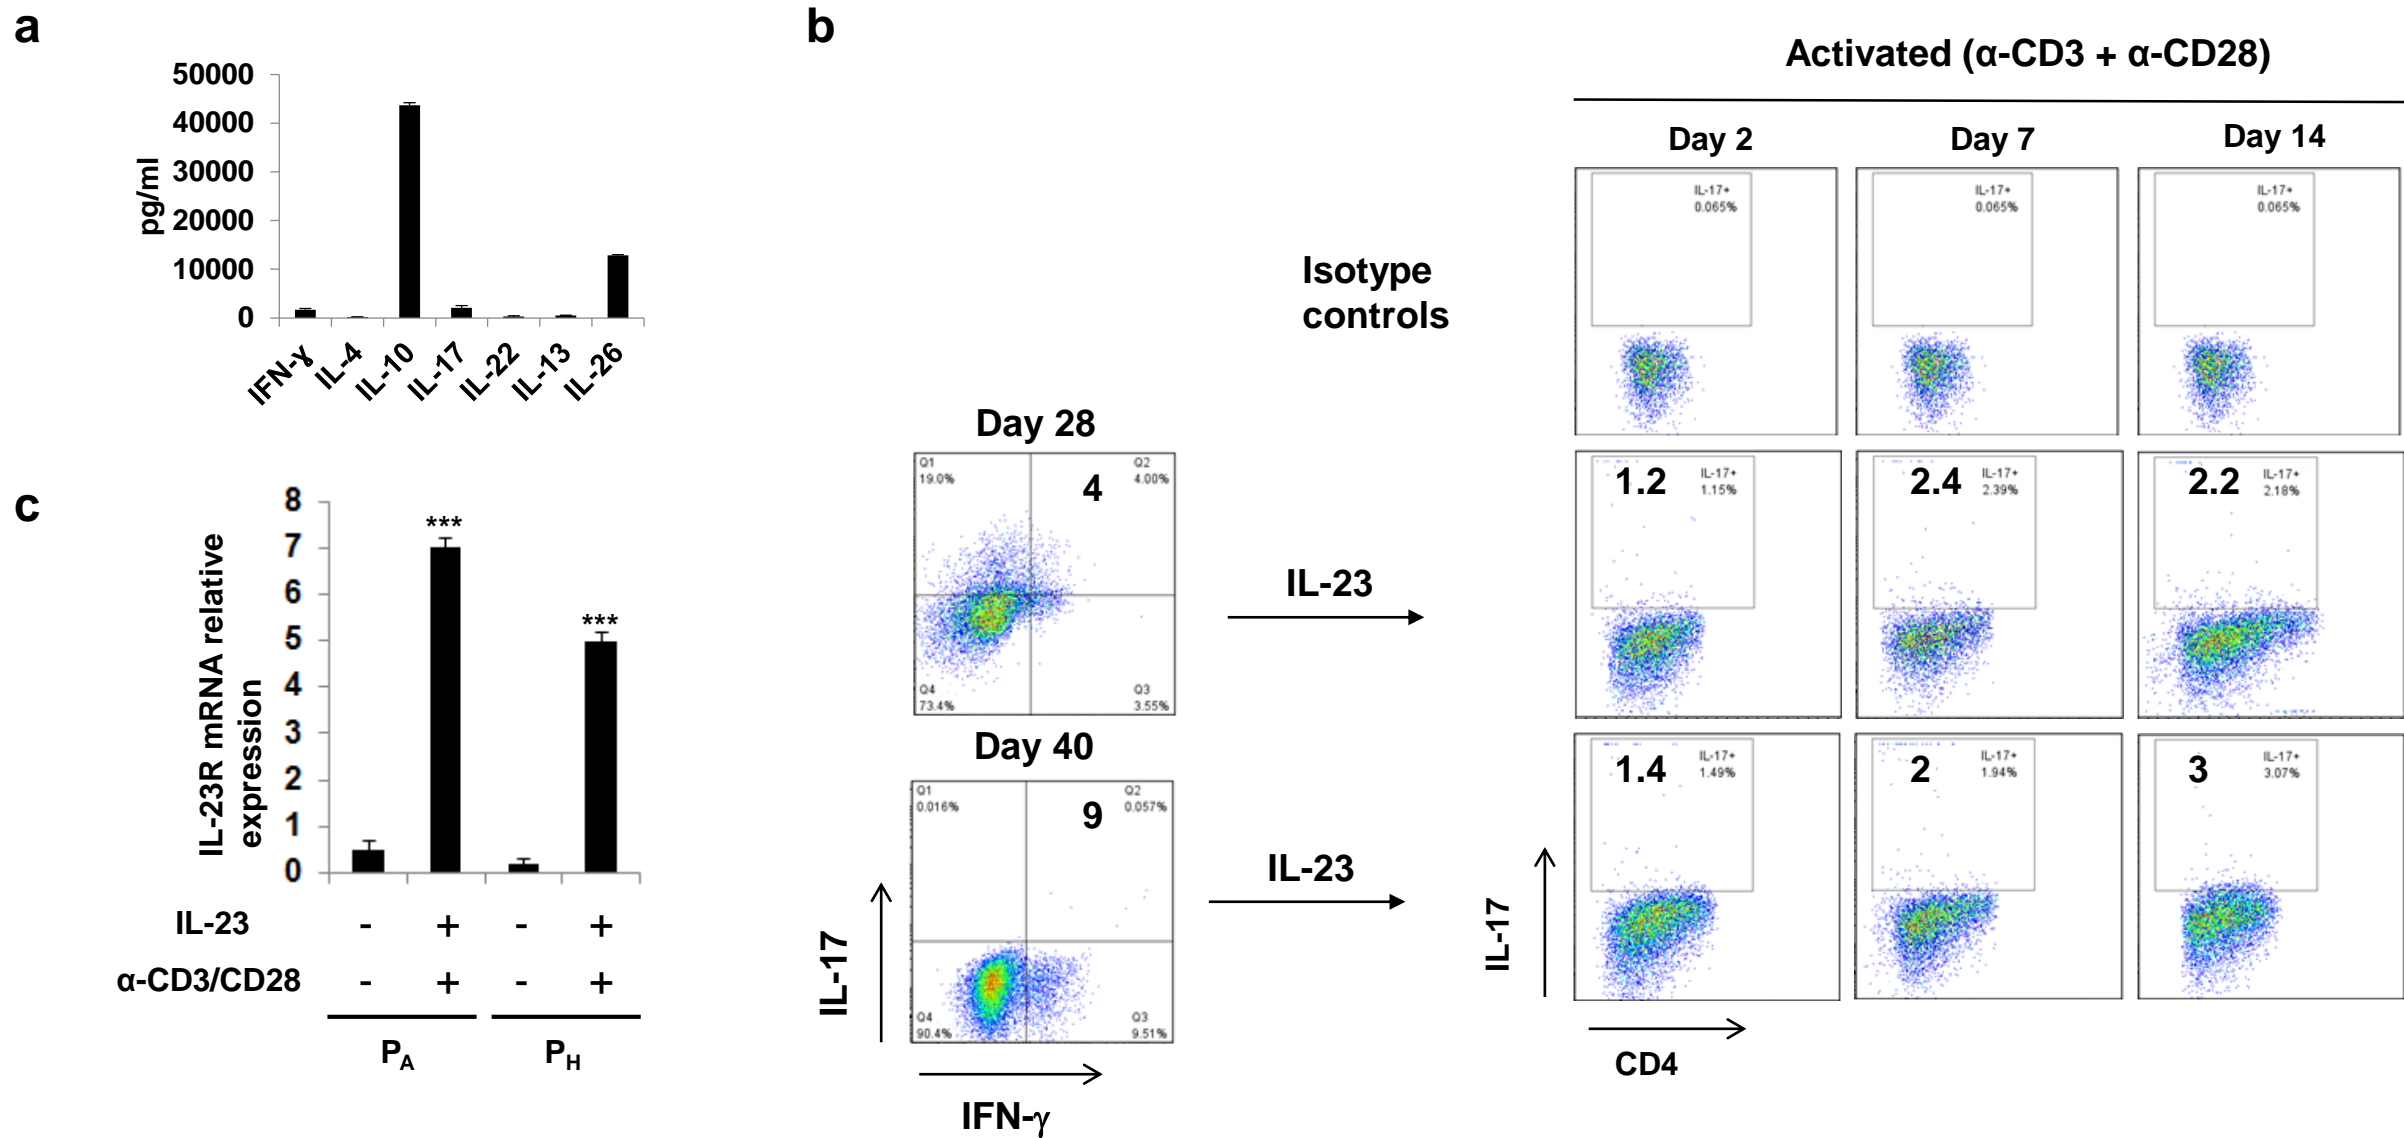

**Supplementary Fig 1. The loss of the Th17 phenotype is irreversible**

Day 28 and 40 P<sub>A</sub> and P<sub>H</sub> “exTh17 clones” from Fig. 3 above were cultured in media supplemented with 100 U/ml of IL-2 and 2ng/ml of IL-23 and stimulated with α-CD3/α-CD28 (0.75μg/ml). (a)

Cytokine profile of a representative “exTh17” clone (b) Flow cytometry on “ex Th17” clones. Data is representative of more than five independent experiments. (c) Real-time PCR of *IL-23R* normalized fold expression in representative “ex Th17” clones. mRNA was analyzed 6 h following (-) no stimulation or α-CD3/α-CD28 (0.75μg/ml) stimulation. Gene expression was normalized to the housekeeping gene *GAPDH* and quantified by the comparative method  $2^{-\Delta\Delta CT}$ . Data represent mean  $\pm$  SD (\*\*\*) $p \leq 0.001$ .

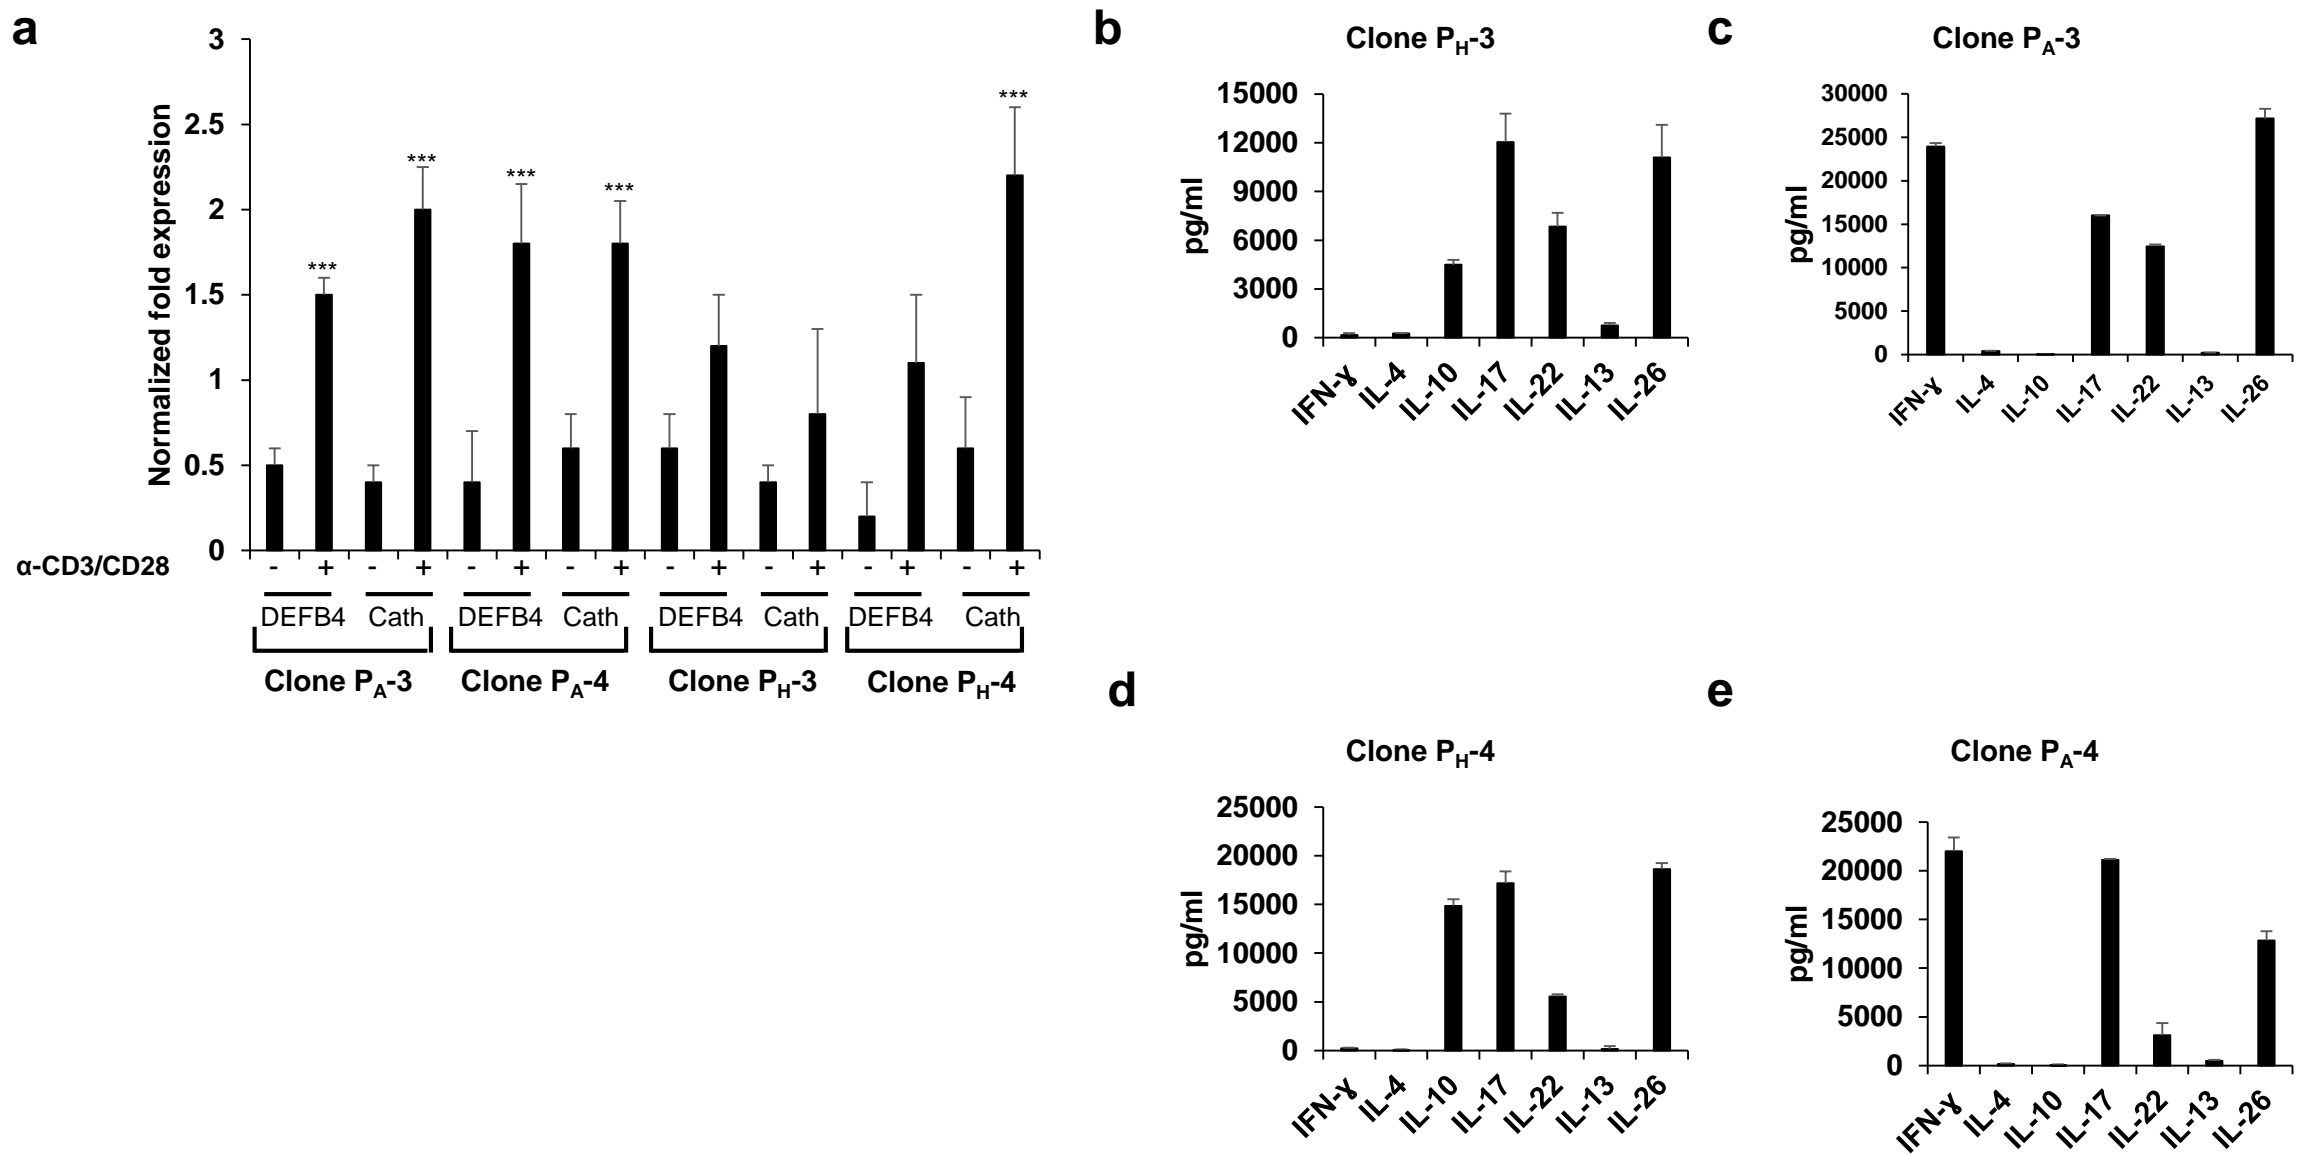

**Supplementary Fig 2.** (a) *DEFB4*, *Cathelicidin* (*Cath*), *tbet* and *RORC* analyzed 24 h following (-) no or  $\alpha$ -CD3/ $\alpha$ -CD28 (0.75 $\mu$ g/ml) stimulation representative paTh17 clones (P<sub>A</sub>-3 and P<sub>A</sub>-4) and prTh17 (P<sub>H</sub>-3 and P<sub>H</sub>-4) generated from two different donors (D3 and D4) are shown. Gene expression was normalized to GAPDH. Data are representative of three independent experiments (n=3). Data represent mean  $\pm$  SD (\*\*\*)p  $\leq$  0.001). (b-e) P<sub>A</sub> and P<sub>H</sub>-strain specific clones derived from donors D3 and D4 analyzed 24 h following (-) no stimulation or  $\alpha$ -CD3/ $\alpha$ -CD28 (0.75 $\mu$ g/ml) stimulation. Cytokine levels accumulated in the culture supernatants were measured using ELISA.

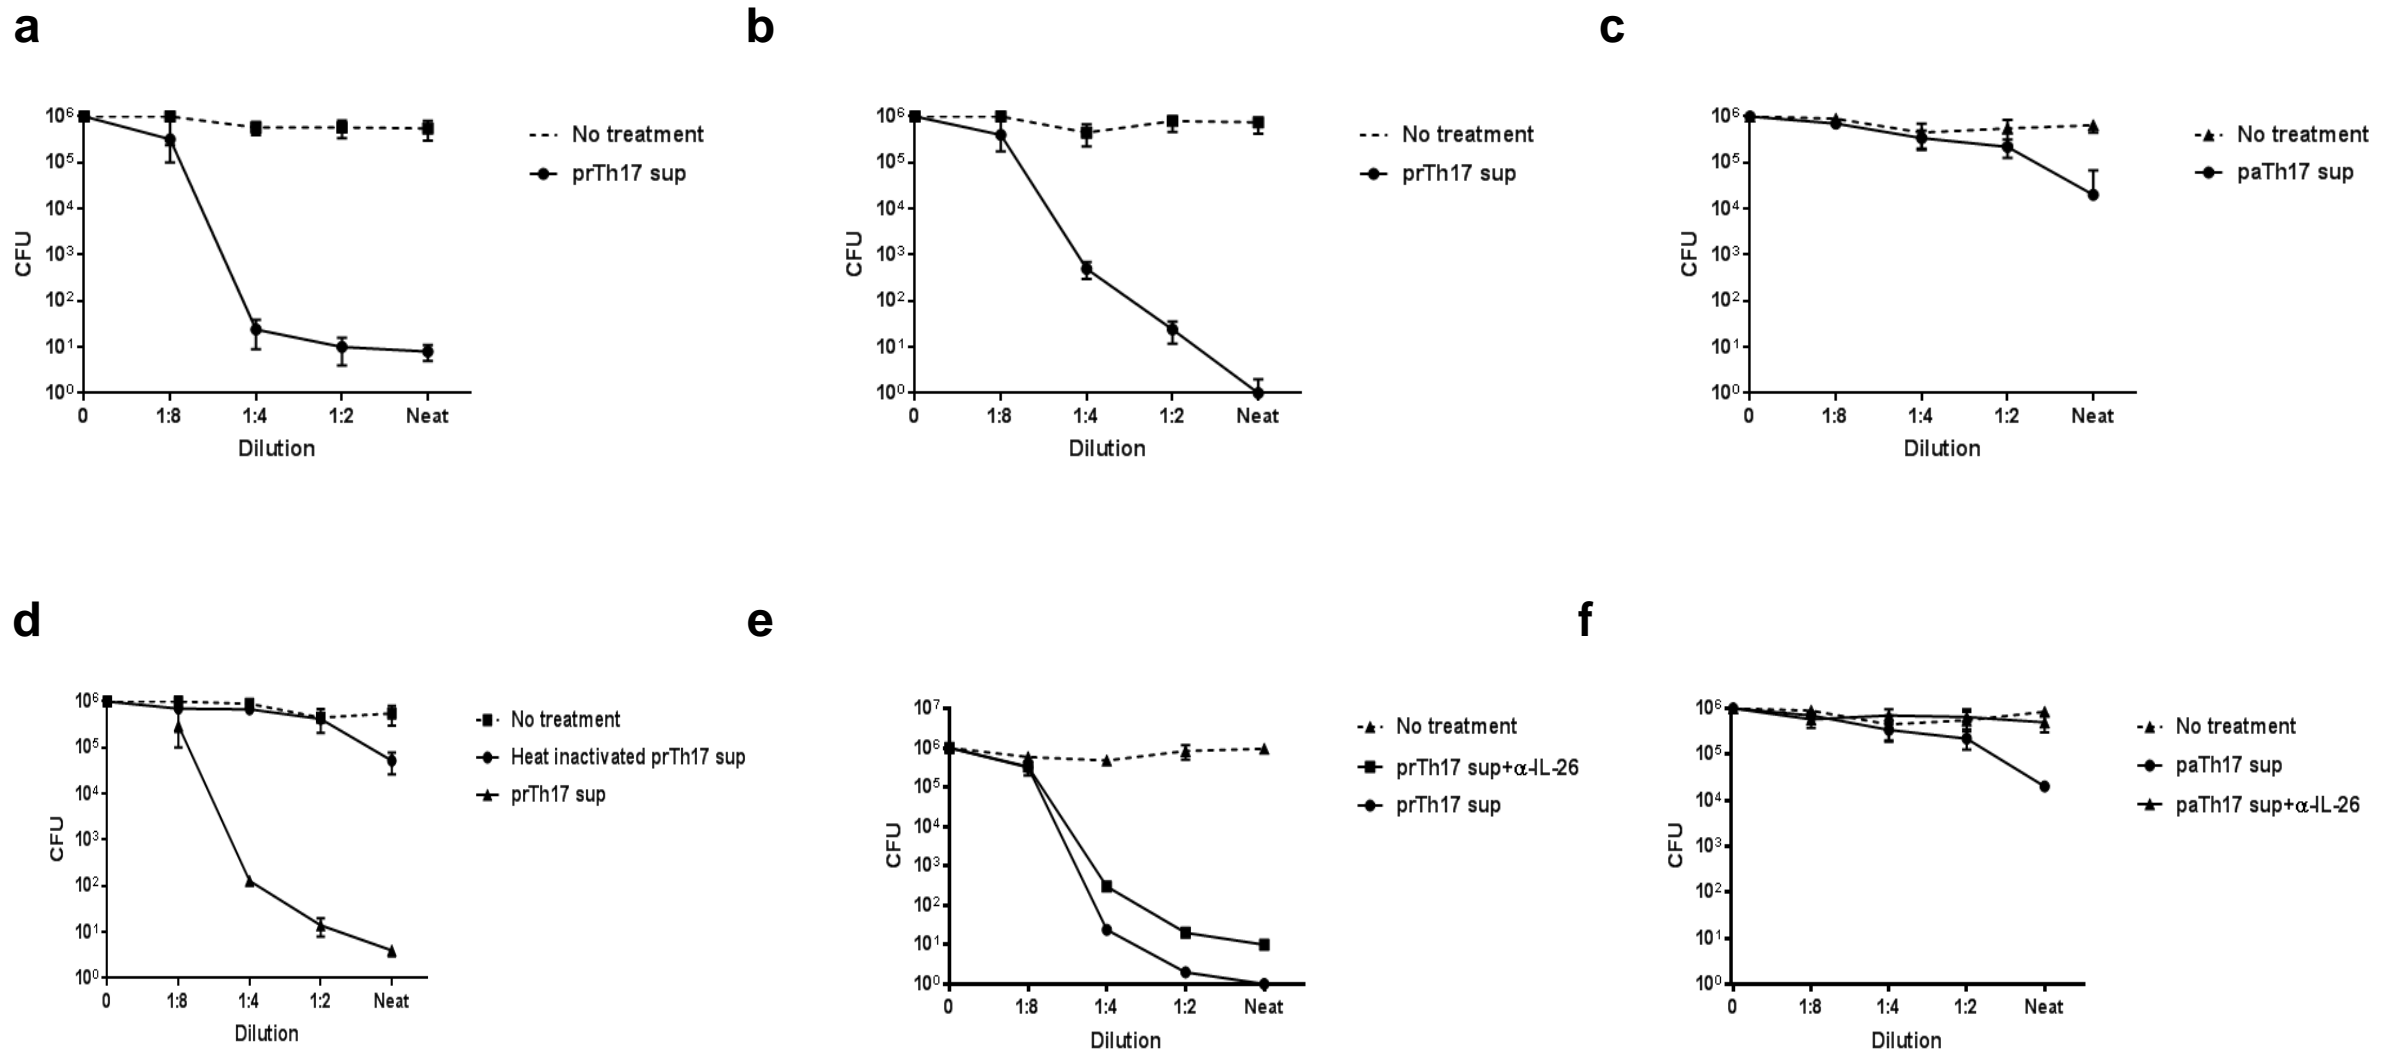

### Supplementary Fig 3. PrTh17 clones are bactericidal against different *P. acnes* strains

Representative CFU assay results for supernatants derived from activated (a) prTh17 clone P<sub>H</sub>-1 against *P. acnes* strain HL110PA1 (b) prTh17 clone P<sub>H</sub>-1 against *P. acnes* strain HL043PA1. (c) paTh17 clone P<sub>A</sub>-2 against HL110PA3. (d) Supernatants derived from prTh17 clone P<sub>H</sub>-2 were heat inactivated for 30 minutes at 60°C prior to being used in CFU assays against strain HL110PA1 (e-f) Supernatants derived from clones prTh17 (P<sub>H</sub>-2) and paTh17 (P<sub>A</sub>-1) were incubated with 10µg/ml of neutralizing anti-IL-26 mAb or an isotype mAb for 12 h at 4°C prior to CFU assay against *P. acnes* strain HL042PA3. Data shows average CFU from three independent experiments (n=3), error bars are mean ± SD.

**a**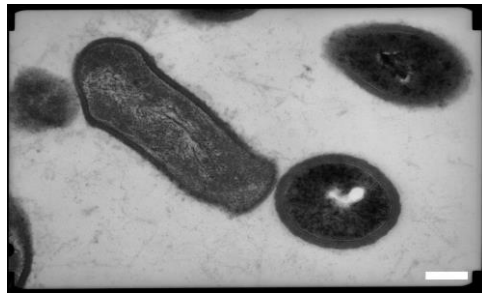**48k****b**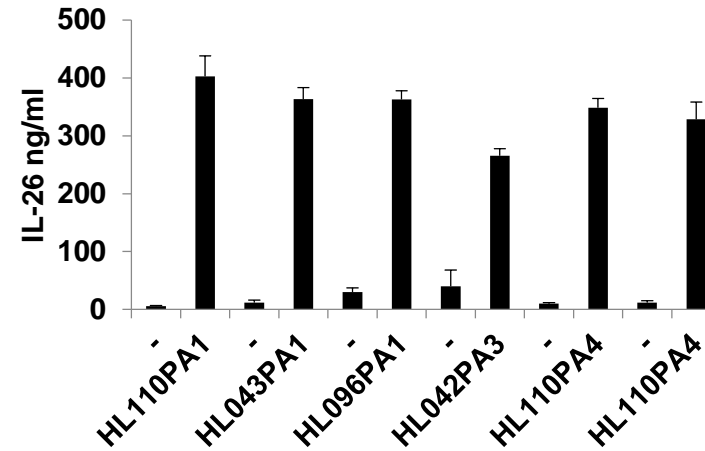**c**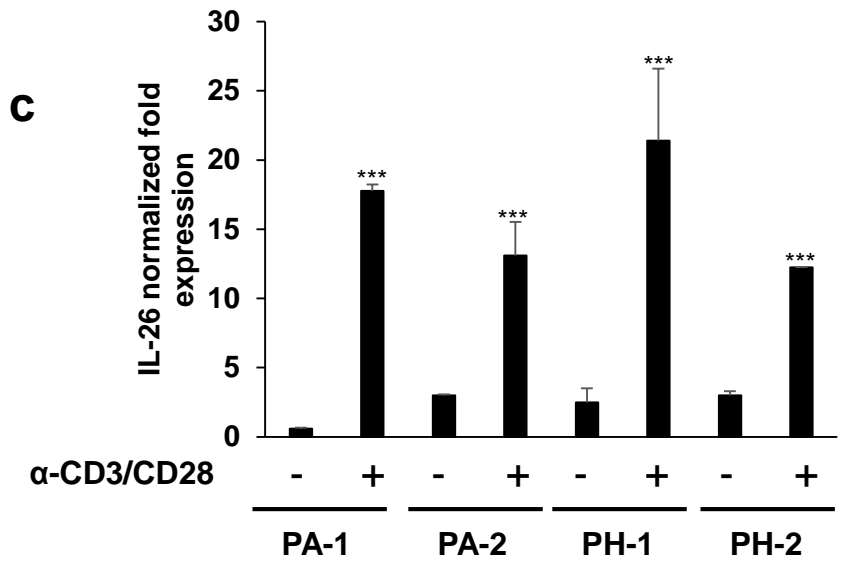**d**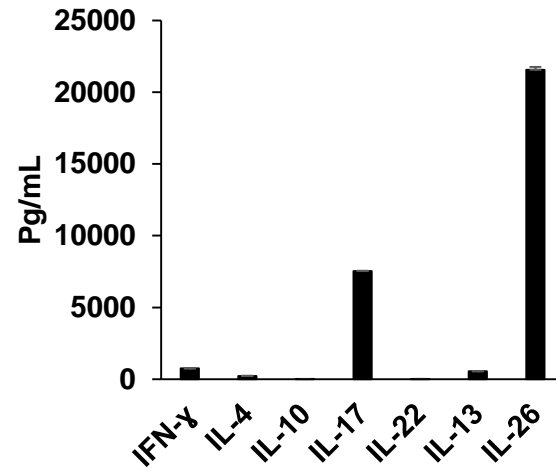**e**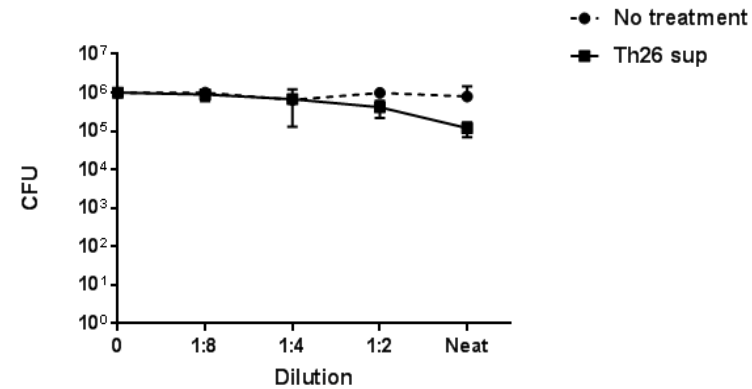**f**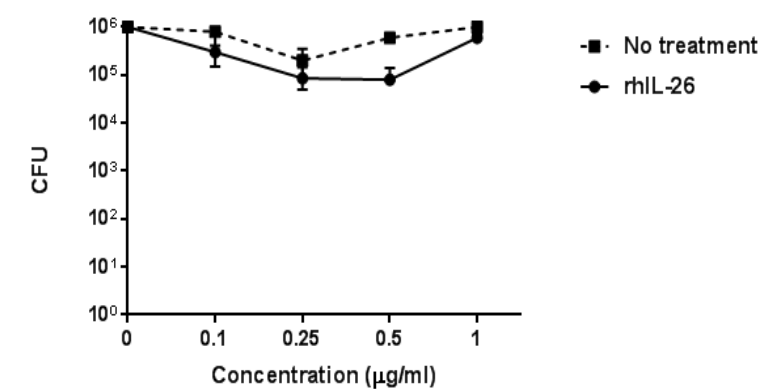

**Supplementary Fig. 4. Natural IL-26 released by Th17 clones lacks antimicrobial potency against *P. acnes*.** (a) TEM micrographs of *P. acnes* after 3 h incubation with media. Scale bar = 0.5 $\mu$ m. (b) IL-26 cytokine levels in PBMCs unstimulated (-) or stimulated with P<sub>A</sub> and P<sub>H</sub> strains (1 MOI). Experiments were performed in triplicates. (c) Real-time PCR of *IL-26* expression in clones analyzed 6 h following (-) no or  $\alpha$ -CD3/ $\alpha$ -CD28 (0.75 $\mu$ g/ml) stimulation. Data are representative of three independent experiments (n=3). Data represent mean  $\pm$  SD (\*\*\*)p  $\leq$  0.001). (d) A “Th26” clone was stimulated with  $\alpha$ -CD3/ $\alpha$ -CD28 (0.75 $\mu$ g/ml) for 24 h and cytokine levels were measured using ELISA (e-f) Th26-derived supernatants and rhIL-26 (0.1-1 $\mu$ g/ml) were tested in CFU assays against *P. acnes* strain HL096PA1 (n=3), error bars are mean  $\pm$  SD.

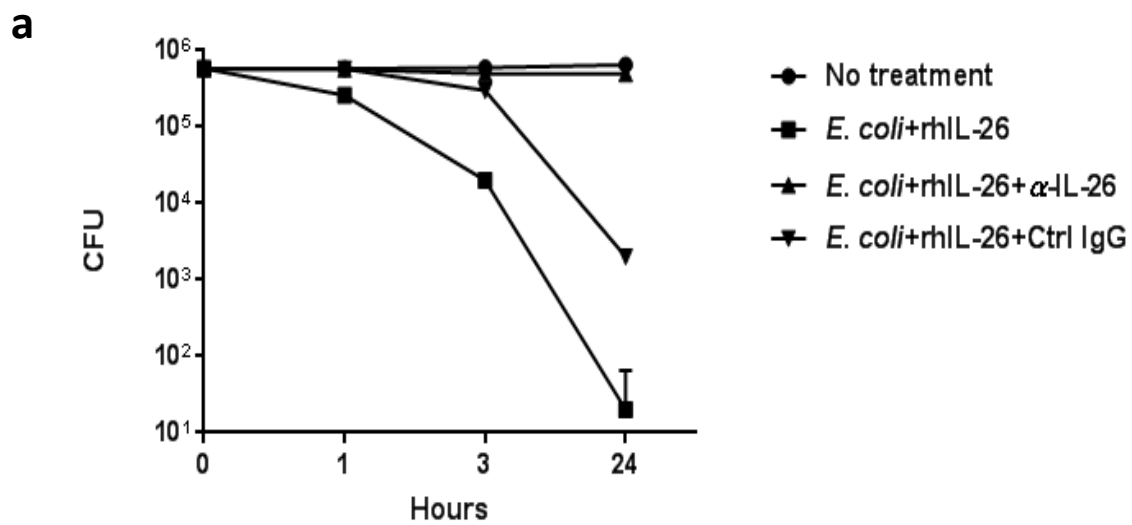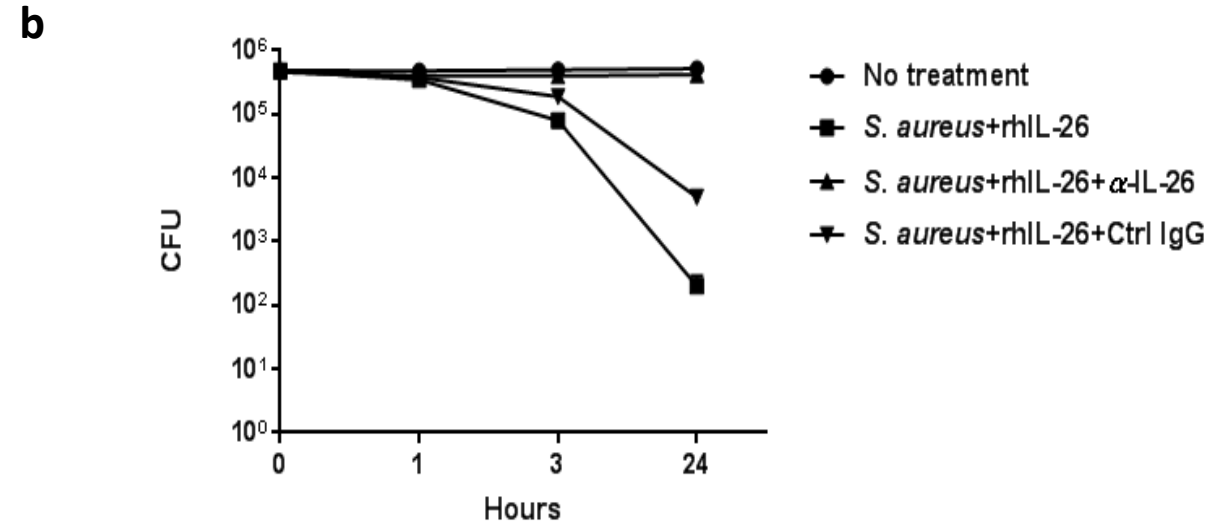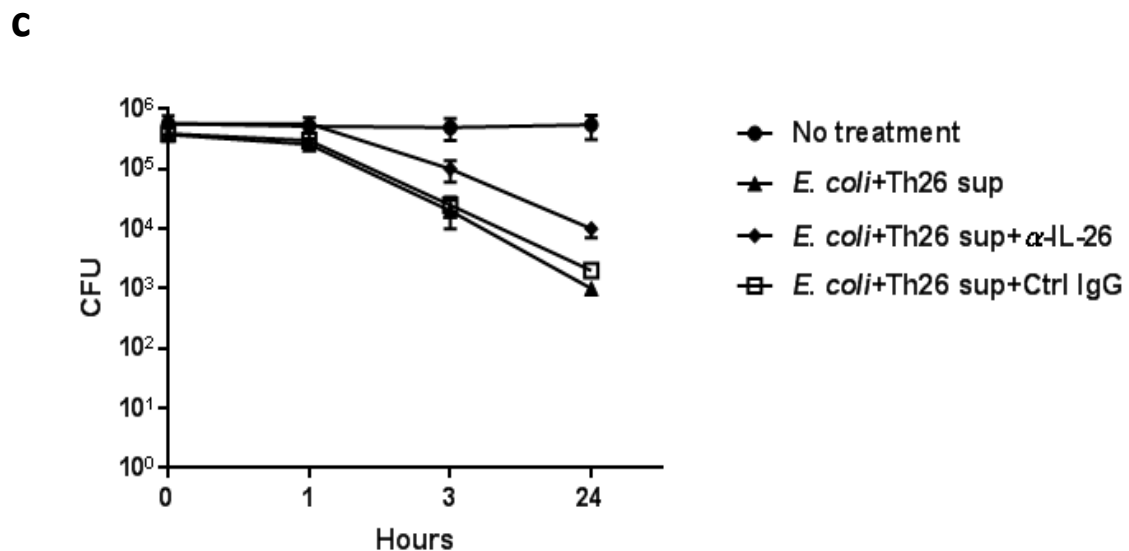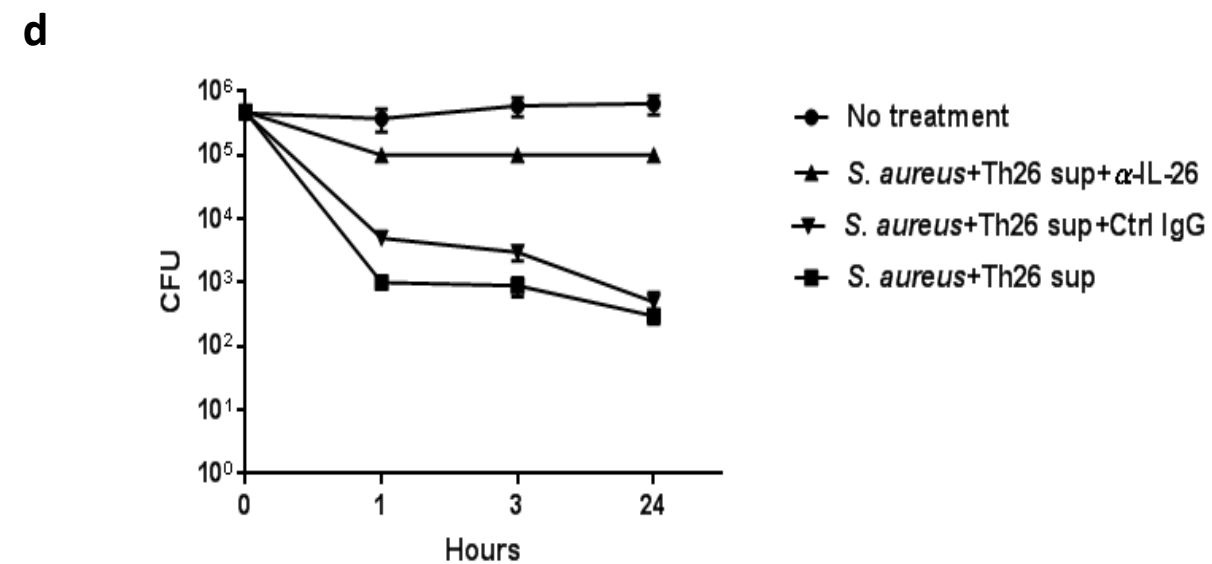

**Supplementary Fig. 5. Recombinant human IL-26 and supernatants derived from a Th26 clone kill *S. aureus* and *E. coli*.** (a-b) *S. aureus* and *E. coli* were incubated with neutralizing anti-IL-26 (1 $\mu$ g/ml), rhIL-26 (1 $\mu$ g/ml), control IgG (1 $\mu$ g/ml) and undiluted (neat) supernatants from “Th26 clone”. Bacteria and treatments were incubated for 1, 3, and 24 h. Remaining bacteria were serially diluted and plated for enumeration. Data shows average CFU from three independent experiments (n=3), error bars are mean  $\pm$  SD.
